# Supplementary material for: Recognition and cleavage of human tRNA methyltransferase TRMT1 by the SARS-CoV-2 main protease
Source: eLife. 2025 Jan 7;12:RP91168. doi: 10.7554/eLife.91168 (PMC11706605; doi:10.7554/eLife.91168)
Supplement: Figure 2—source data 4. [file elife-91168-fig2-data4.xlsx]

## Sheet: Figure 2C - m22G activity
					Counts per Minute
					Mpro WT + TRMT1		Mpro C145A + TRMT1		TRMT1
				Time (Hours)	Average	SD	Average	SD	Average	SD
				0	22.33	0.94	70	8.83	57	12.68
				0.5	21	2.83	1783.33	50.73	1688.33	61.28
				2	23	7.12	2702.33	44.99	2503	266.13
				4	27.67	4.99	2806	35.36	2569.67	83.99
					14C-labeled tRNA Product (μM)
					Mpro WT + TRMT1		Mpro C145A + TRMT1		TRMT1
				Time (Hours)	Average	SD	Average	SD	Average	SD
				0	-0.000609497	-0.0143908	0.0301037	-0.00930739	0.021728	-0.00682688
				0.5	-0.0014664	-0.0131731	1.13398	0.0176883	1.07277	0.0244855
				2	-0.000177824	-0.0104091	1.72608	0.0139901	1.59766	0.156468
				4	0.002831	-0.0117815	1.79288	0.00778558	1.64061	0.0391173

## Sheet: Figure 2D - tRNA binding
		WT		Raw Values (RID)						Background Substraction (RID)						Fraction Bound
				Band 1		Band 2		Band 3		Band 1		Band 2		Band 3		Band 1	Band 2	Band 3	Average	Standard Deviation
			[TRMT1] µM	Lower	Upper	Lower	Upper	Lower	Upper	Lower	Upper	Lower	Upper	Lower	Upper
			0	611562	132317	1066894	427135	954809	309418	521524	0	860922	0	767731	0	0	0	0	0	0
			7.78018	150258	471618	331565	1073684	378829	961650	60220	339301	125593	646549	191751	652232	0.84927	0.837345	0.772802	0.819805	0.0335909
			5.18679	221160	398763	458178	1090981	472324	962002	131122	266446	252206	663846	285246	652584	0.67019	0.724682	0.695845	0.696905	0.0222588
			3.45786	450383	331953	756613	970054	761862	730672	360345	199636	550641	542919	574784	421254	0.356505	0.496469	0.42293	0.425301	0.0571648
			2.30524	517957	268618	946509	786306	937994	577523	427919	136301	740537	359171	750916	268105	0.241574	0.326606	0.263101	0.277094	0.0360966
			1.53683	620998	212720	1064821	642250	945079	494366	530960	80403	858849	215115	758001	184948	0.131514	0.2003	0.196138	0.175984	0.0314907
			1.02455	695948	187333	1127697	515949	939692	444890	605910	55016	921725	88814	752614	135472	0.0832408	0.0878878	0.152544	0.107891	0.0316314
			0.683034	662307	170726	1187774	466134	1042262	426640	572269	38409	981802	38999	855184	117222	0.0628957	0.0382043	0.120548	0.0738828	0.0345029
			0.455356	662729	160494	1209610	394334	1077827	426499	572691	28177	1003638	-32801	890749	117081	0.0468938	-0.0337863	0.116171	0.043093	0.0612789
			0.30357	679657	136818	1194385	378337	1085225	365219	589619	4501	988413	-48798	898147	55801	0.00757591	-0.051934	0.0584948	0.00471223	0.0451278
			0.20238	680296	132433	1202399	336048	1081130	341055	590258	116	996427	-91087	894052	31637	0.000196486	-0.100611	0.0341767	-0.0220792	0.0572368
			0.13492	619794	146093	1067471	332633	995099	322101	529756	13776	861499	-94502	808021	12683	0.0253453	-0.12321	0.0154538	-0.0274704	0.0678187
			Blank	90038	132317	205972	427135	187078	309418
		C145A		Raw Values (RID)						Background Substraction (RID)						Fraction Bound
				Band 1		Band 2		Band 3		Band 1		Band 2		Band 3		Band 1	Band 2	Band 3	Average	Standard Deviation
			[TRMT1] µM	Lower	Upper	Lower	Upper	Lower	Upper	Lower	Upper	Lower	Upper	Lower	Upper
			0	667360	214425	968886	293487	879116	169279	489475	0	759553	0	745807	0	0	0	0	0	0
			7.78018	146665	1265310	343020	1647087	142048	1753540	-31220	1050885	133687	1353600	8739	1584261	1.03062	0.910114	0.994514	0.978415	0.0504956
			5.18679	142278	644118	318120	1780446	146185	1798084	-35607	429693	108787	1486959	12876	1628805	1.09035	0.931827	0.992157	1.00478	0.0653307
			3.45786	149995	998007	385771	1353217	107003	1328825	-27890	783582	176438	1059730	-26306	1159546	1.03691	0.85727	1.02321	0.972463	0.0816454
			2.30524	204628	1000131	393521	1230821	226131	1239677	26743	785706	184188	937334	92822	1070398	0.967083	0.83577	0.920203	0.907685	0.0543344
			1.53683	236894	808928	446930	1066137	287130	1001104	59009	594503	237597	772650	153821	831825	0.909705	0.764813	0.843939	0.839486	0.0592356
			1.02455	367147	619589	753270	831524	530696	762026	189262	405164	543937	538037	397387	592747	0.681605	0.497274	0.598653	0.592511	0.0753784
			0.683034	542149	457565	1040944	652313	760506	497396	364264	243140	831611	358826	627197	328117	0.400294	0.301424	0.343465	0.348394	0.0405137
			0.455356	702937	363545	1218259	478078	936869	345879	525052	149120	1008926	184591	803560	176600	0.22119	0.154661	0.180175	0.185342	0.0274048
			0.30357	707838	302294	1222115	414851	927213	295606	529953	87869	1012782	121364	793904	126327	0.142224	0.107009	0.137277	0.128837	0.015566
			0.20238	743324	242088	1194969	389143	972513	207389	565439	27663	985636	95656	839204	38110	0.0466412	0.0884645	0.0434394	0.0595151	0.0205121
			0.13492	665411	205965	1086103	314091	884945	201769	487526	-8460	876770	20604	751636	32490	-0.0176594	0.0229603	0.0414347	0.0155785	0.0246832
			Blank	177885	214425	209333	293487	133309	169279
		TRMT1		Raw Values (RID)						Background Substraction (RID)						Fraction Bound
				Band 1		Band 2		Band 3		Band 1		Band 2		Band 3		Band 1	Band 2	Band 3	Average	Standard Deviation
			[TRMT1] µM	Lower	Upper	Lower	Upper	Lower	Upper	Lower	Upper	Lower	Upper	Lower	Upper
			0	710707	627457	721784	714840	238930	133992	529986	0	526696	0	204137	0	0	0	0	0	0
			7.78018	180222	1942126	197828	1692811	38233	744471	2337	1727701	-11505	1399324	-95076	575192	0.998649	1.00829	1.19803	1.06832	0.0917997
			5.18679	166265	1842843	183373	1651472	58593	722634	-11620	1628418	-25960	1357985	-74716	553355	1.00719	1.01949	1.1561	1.06093	0.0674862
			3.45786	135088	1734414	223861	1661956	58644	676454	-42797	1519989	14528	1368469	-74665	507175	1.02897	0.989495	1.17263	1.0637	0.0786946
			2.30524	209748	1611259	290610	1359005	99035	677776	31863	1396834	81277	1065518	-34274	508497	0.977698	0.929127	1.07227	0.993033	0.0594371
			1.53683	349073	1164261	405720	1114656	175094	521161	171188	949836	196387	821169	41785	351882	0.847293	0.807001	0.893857	0.849384	0.0354895
			1.02455	525894	730015	597693	950694	225063	361430	348009	515590	388360	657207	91754	192151	0.597025	0.628565	0.676814	0.634135	0.0328112
			0.683034	630831	611364	655424	832396	251580	255081	452946	396939	446091	538909	118271	85802	0.46705	0.547116	0.420448	0.478205	0.0523101
			0.455356	702456	515617	652833	632254	267479	205902	524571	301192	443500	338767	134170	36623	0.364744	0.433058	0.214429	0.33741	0.0913235
			0.30357	757197	478050	731542	655064	287582	158601	579312	263625	522209	361577	154273	-10678	0.312746	0.409123	-0.0743619	0.215836	0.208939
			0.20238	875478	503204	759219	672499	271789	139920	697593	288779	549886	379012	138480	-29359	0.292769	0.408023	-0.26905	0.143914	0.295776
			0.13492	910551	764878	770335	849607	256269	133888	732666	550453	561002	556120	122960	-35391	0.428996	0.497815	-0.40415	0.17422	0.409933
			Blank	180721	627457	195088	714840	34793	133992
