# Supplementary material for: Recognition and cleavage of human tRNA methyltransferase TRMT1 by the SARS-CoV-2 main protease
Source: eLife. 2025 Jan 7;12:RP91168. doi: 10.7554/eLife.91168 (PMC11706605; doi:10.7554/eLife.91168)
Supplement: Figure 7—source data 1. [file elife-91168-fig7-data1.xlsx]

## Sheet: Distance
	nsp4/5		TRMT1
Distance (Angstroms)	Counts	Proportion	Counts	Proportion
10.75	556	0.00193963	1675	0.00558685
11.25	5083	0.0177322	16067	0.0535904
11.75	14979	0.0522548	43712	0.145799
12.25	18148	0.06331	53361	0.177982
12.75	13895	0.0484732	37715	0.125796
13.25	10173	0.0354889	19646	0.0655279
13.75	7859	0.0274164	10033	0.0334644
14.25	5886	0.0205335	6433	0.0214569
14.75	4792	0.0167171	4622	0.0154164
15.25	3859	0.0134623	3955	0.0131916
15.75	2692	0.00939115	3317	0.0110636
16.25	1678	0.00585377	2755	0.00918912
16.75	992	0.00346063	2153	0.00718119
17.25	760	0.00265129	1969	0.00656747
17.75	849	0.00296177	1897	0.00632732
18.25	1334	0.00465371	2341	0.00780825
18.75	1849	0.00645031	3224	0.0107534
19.25	2416	0.00842831	4593	0.0153197
19.75	3404	0.011875	5573	0.0185884
20.25	5427	0.0189323	6315	0.0210633
20.75	8734	0.0304689	6843	0.0228244
21.25	13737	0.0479221	6728	0.0224408
21.75	19639	0.0685114	6610	0.0220472
22.25	23387	0.0815864	5982	0.0199526
22.75	20497	0.0715046	5217	0.017401
23.25	14525	0.050671	4621	0.015413
23.75	10097	0.0352238	4335	0.0144591
24.25	8398	0.0292967	4536	0.0151295
24.75	7660	0.0267222	4905	0.0163603
25.25	7062	0.0246361	5057	0.0168673
25.75	6423	0.0224069	4427	0.014766
26.25	5674	0.019794	3366	0.0112271
26.75	5501	0.0191904	2177	0.00726124
27.25	5403	0.0188486	1349	0.0044995
27.75	5339	0.0186253	819	0.00273172
28.25	5171	0.0180392	558	0.00186117
28.75	4683	0.0163368	411	0.00137086
29.25	4306	0.0150216	315	0.00105066
29.75	3786	0.0132076	199	0.000663751
	SUM		SUM
	286653		299811

## Sheet: attackangles_TRMT1
	TRMT1
	Original data		Bin Centers	Counts	Proportion
	117.053		2.5	0	0
	129.985		7.5	0	0
	142.04		12.5	0	0
	102.235		17.5	0	0
	108.207		22.5	0	0
	103.352		27.5	0	0
	102.525		32.5	0	0
	93.0976		37.5	0	0
	103.236		42.5	7	2.51042e-05
	114.689		47.5	164	0.000588155
	116.159		52.5	754	0.00270408
	147.923		57.5	1459	0.00523243
	116.947		62.5	881	0.00315954
	107.947		67.5	253	0.000907337
	127.688		72.5	382	0.00136997
	122.887		77.5	1626	0.00583134
	127.992		82.5	6151	0.0220594
	146.63		87.5	17014	0.0610175
	151.779		92.5	32342	0.115988
	141.409		97.5	43054	0.154405
	149.651		102.5	42144	0.151142
	128.426		107.5	32451	0.116379
	137.268		112.5	21848	0.0783537
	143.837		117.5	14651	0.0525431
	144.727		122.5	10828	0.0388326
	126.354		127.5	9374	0.0336181
	136.863		132.5	9241	0.0331411
	134.69		137.5	9656	0.0346294
	133.288		142.5	9536	0.0341991
	139.973		147.5	7745	0.027776
	136.306		152.5	4731	0.0169668
	142.464		157.5	1961	0.00703276
	147.994		162.5	507	0.00181826
	140.022		167.5	75	0.000268973
	106.693		172.5	3	1.07589e-05
	126.132		177.5	0	0
	126.337
	142.959
	130.134			SUM
	125.395			278838
	131.704
	150.682
	136.359
	123.786
	103.602
	130.21
	116.816
	125.307
	134.83
	128.168
	132.073
	145.284
	134.886
	143.084
	128.791
	119.553
	139.417
	131.329
	119.616
	141.392
	138.707
	148.332
	135.756
	169.27
	137.153
	141.411
	133.712
	133.017
	150.795
	145.951
	144.885
	147.236
	149.616
	137.013
	151.141
	148.544
	149.804
	117.821
	150.743
	142.329
	126.178
	134.861
	136.781
	125.908
	149.24
	139.374
	142.852
	142.118
	152.862
	151.247
	148.974
	151.765
	131.053
	141.572
	144.486
	145.611
	119.439
	125.309
	145.017
	133.222
	124.457
	137.382
	134.016
	144.747
	142.377
	143.606
	142.534
	152.731
	139.455
	132.005
	145.244
	128.928
	143.999
	141.202
	146.743
	152.026
	123.883
	146.433
	130.453
	135.543
	151.794
	142.887
	142.082
	129.701
	127.425
	148.283
	127.008
	153.918
	144.256
	147.784
	144.374
	148.572
	147.276
	142.958
	139.509
	141.366
	147.654
	139.879
	149.853
	137.899
	160.104
	149.091
	150.037
	140.691
	149.051
	128.165
	144.512
	134.264
	153.686
	143.049
	149.508
	147.237
	143.468
	146.564
	120.168
	128.827
	94.5204
	144.057
	130.094
	124.527
	120.772
	146.823
	119.767
	147.598
	150.688
	155.942
	153.024
	140.168
	115.95
	121.057
	118.661
	142.595
	140.778
	143.17
	150.138
	146.791
	142.938
	98.4551
	117.728
	136.465
	126.986
	113.575
	152.075
	136.966
	142.984
	151.355
	142.279
	138.812
	119.829
	123.274
	146.067
	130.453
	145.046
	141.843
	132.88
	148.449
	141.922
	127.511
	133.351
	148.742
	96.1644
	111.719
	101.982
	135.56
	97.2382
	110.508
	97.5351
	97.954
	127.306
	122.26
	125.116
	100.195
	120.666
	94.1801
	117.75
	96.1802
	93.4006
	106.933
	95.7296
	97.7096
	109.5
	99.5471
	97.1841
	95.6336
	98.2603
	129.274
	103.444
	101.872
	104.001
	107.816
	90.1113
	107.179
	101.011
	100.246
	93.1907
	108.044
	110.412
	105.754
	110.936
	105.503
	104.398
	109.751
	97.791
	102.743
	102.114
	93.4969
	110.142
	103.188
	85.5458
	107.749
	103.248
	110.422
	92.2076
	89.5598
	107.728
	88.2609
	88.1531
	83.055
	88.7953
	99.5658
	102.007
	82.8983
	86.2123
	113.56
	90.046
	92.4569
	94.7207
	90.3513
	89.4369
	98.4037
	89.213
	90.7731
	127.245
	121.603
	127.444
	139.189
	154.267
	141.63
	145.558
	157.334
	151.52
	146.023
	135.633
	133.601
	145.66
	128.031
	139.244
	129.008
	132.832
	149.796
	150.084
	141.659
	109.566
	143.06
	141.81
	145.202
	131.031
	133.192
	143.368
	149.977
	153.492
	149.212
	155.751
	147.174
	155.094
	101.874
	148.116
	142.985
	132.742
	139.179
	110.268
	140.822
	142.19
	148.218
	140.233
	137.097
	134.332
	139.796
	154.477
	125.21
	141.4
	142.434
	141.378
	120.275
	128.781
	115.265
	129.565
	151.836
	137.024
	149.224
	146.36
	150.362
	135.021
	148.661
	132.417
	141.202
	130.408
	131.947
	133.996
	126.565
	140.393
	132.375
	138.807
	140.57
	143.823
	120.189
	112.991
	131.579
	125.264
	107.667
	150.44
	124.538
	132.784
	134.254
	145.56
	139.411
	149.233
	117.083
	155.178
	131.695
	141.287
	125.945
	145.394
	120.278
	94.1943
	140.625
	152.176
	146.34
	134.108
	143.891
	140.101
	152.339
	153.469
	140.37
	132.786
	145.63
	129.458
	137.7
	149.868
	151.028
	149.942
	137.896
	148.258
	148.59
	139.384
	147.042
	142.369
	138.587
	130.648
	136.335
	154.255
	157.714
	153.456
	144.116
	140.011
	142.198
	152.577
	146.002
	160.814
	146.092
	127.904
	142.54
	145.426
	154.346
	136.607
	148.309
	142.188
	158.214
	147.838
	151.708
	143.014
	145.62
	149.912
	152.35
	131.515
	144.955
	160.69
	132.103
	150.571
	104.27
	140.476
	146.46
	157.372
	133.42
	146.114
	130.664
	143.522
	147.061
	148.679
	154.916
	153.53
	145.618
	136.621
	87.7461
	105.996
	101.697
	148.043
	149.419
	135.289
	121.213
	114.61
	91.8019
	104.566
	110.13
	119.115
	145.602
	144.245
	137.04
	116.341
	95.0743
	148.987
	147.61
	149.301
	138.054
	135.49
	146.471
	157.824
	134.6
	144.447
	138.981
	146.831
	134.152
	146.755
	146.828
	142.381
	145.606
	130.206
	142.952
	134.522
	133.934
	109.49
	141.075
	146.988
	147.636
	141.406
	133.844
	140.574
	150.287
	146.631
	149.794
	138.669
	135.723
	150.351
	146.605
	150.716
	144.055
	135.325
	158.932
	149.909
	139.736
	135.514
	145.845
	147.468
	98.6416
	133.902
	140.977
	145.827
	158.777
	140.4
	149.191
	168.101
	153.304
	149.61
	143.128
	148.303
	158.794
	147.087
	135.589
	145.379
	138.074
	143.786
	147.299
	157.478
	140.887
	134.045
	132.489
	117.052
	120.204
	128.607
	143.36
	141.784
	141.062
	152.91
	153.011
	148.234
	158.133
	150.54
	136.827
	149.702
	137.292
	152.161
	132.504
	150.328
	140.475
	143.501
	149.1
	131.349
	141.834
	128.861
	146.11
	149.195
	136.055
	150.6
	122.111
	98.8017
	102.028
	134.286
	117.964
	124.631
	138.435
	145.918
	99.3645
	150.105
	147.718
	143.516
	138.954
	129.511
	126.827
	132.503
	127.959
	115.34
	148.889
	131.399
	132.643
	147.023
	95.389
	95.7227
	133.204
	132.702
	96.4596
	124.545
	112.739
	127.398
	143.038
	146.028
	139.382
	106.842
	103.953
	137.961
	103.132
	144.032
	142.086
	139.554
	143.441
	148.903
	103.03
	103.37
	95.3638
	107.193
	93.0396
	149.916
	113.585
	116.55
	100.553
	101.172
	89.305
	130.09
	150.909
	141.72
	138.976
	144.249
	127.448
	132.182
	94.3455
	106.343
	97.8627
	114.787
	127.912
	147.368
	109.762
	121.096
	139.072
	158.28
	148.885
	143.266
	146.143
	145.326
	141.047
	147.852
	134.154
	148.3
	145.007
	146.648
	125.726
	139.423
	140.378
	141.662
	118.047
	153.002
	159.431
	142.13
	159.246
	131.803
	149.227
	140.471
	152.922
	137.833
	133.266
	136.347
	145.962
	153.152
	137.274
	115.849
	137.906
	117.298
	129.649
	128.339
	121.976
	138.427
	156.845
	128.895
	149.396
	141.981
	142.92
	139.137
	144.881
	150.951
	147.18
	142.728
	139.549
	144.632
	142.559
	132.819
	150.28
	117.139
	148.788
	134.805
	123.301
	126.191
	132.817
	118.105
	135.78
	130.564
	141.733
	105.804
	112.057
	116.055
	121.575
	143.481
	131.775
	160.484
	140.205
	134.307
	132.964
	145.895
	137.672
	159.44
	150.809
	151.041
	96.4173
	84.5427
	105.478
	98.77
	143.469
	147.798
	132.746
	166.04
	143.809
	153.837
	141.252
	140.172
	155.976
	148.336
	148.194
	147.919
	133.487
	135.954
	150.763
	133.724
	144.51
	142.193
	128.369
	137.39
	142.577
	140.391
	105.949
	127.665
	112.108
	109.963
	133.307
	138.014
	129.536
	134.753
	133.766
	151.37
	154.395
	137.237
	123.416
	128.83
	132.764
	104.51
	127.949
	114.985
	116.319
	119.301
	99.9688
	118.721
	112.358
	128.423
	98.6223
	135.456
	138.965
	111.578
	104.014
	105.143
	137.272
	109.264
	121.805
	120.969
	120.118
	122.184
	110.826
	104.011
	93.5865
	106.295
	98.3005
	111.417
	103.912
	100.597
	92.5255
	113.191
	92.359
	112.098
	114.74
	103.923
	99.1228
	119.755
	98.0813
	110.155
	105.104
	98.0019
	102.442
	107.95
	106.027
	87.1964
	94.2675
	94.8007
	113.806
	98.3544
	102.93
	105.446
	113.526
	114.108
	112.084
	110.792
	104.871
	99.0859
	99.8805
	101.962
	107.05
	116.063
	100.236
	117.541
	98.8281
	103.731
	106.019
	110.074
	122.988
	126.566
	142.017
	147.395
	141.22
	150.762
	116.334
	118.043
	126.899
	117.985
	99.2138
	123.631
	130.09
	134.697
	140.887
	148.246
	97.4056
	122.912
	102.091
	132.478
	144.43
	127.02
	115.724
	112.99
	112.184
	153.959
	97.7142
	116.95
	138.921
	109.062
	123.934
	112.914
	151.389
	122.2
	145.043
	141.673
	126.078
	138.402
	129.21
	136.62
	140.073
	141.377
	125.839
	138.787
	137.373
	110.468
	131.136
	110.215
	134.382
	143.11
	130.381
	141.295
	108.621
	140.357
	142.161
	99.7237
	119.005
	127.978
	138.096
	132.555
	132.331
	144.822
	145.653
	141.145
	139.152
	144.459
	139.878
	138.113
	126.056
	139.477
	144.967
	132.079
	146.534
	158.749
	145.499
	156.497
	153.586
	132.776
	144.518
	152.427
	141.496
	135.319
	135.104
	155.661
	139.376
	150.301
	143.388
	149.919
	134.676
	146.413
	146.762
	145.619
	144.986
	146.322
	155.922
	143.339
	130.588
	142.913
	135.966
	95.0077
	133.531
	133.389
	135.928
	154.69
	135.935
	155.135
	149.656
	136.23
	141.679
	135.217
	144.423
	153.01
	138.462
	136.328
	132.545
	158.403
	112.121
	132.579
	131.554
	134.315
	129.355
	127.816
	141.714
	150.062
	135.068
	112.966
	147.528
	135.778
	142.692
	137.758
	123.499
	148.048
	135.427
	109.38
	116.164
	137.176
	134.471
	137.491
	142.91
	149.294
	98.4359
	124.539
	147.631
	128
	142.525
	104.031
	93.9837
	148.624
	136.688
	121.758
	138.105
	139.198
	143.573
	146.077
	129.925
	141.447
	157.285
	107.099
	117.834
	137.499
	103.013
	105.281
	142.472
	146.01
	132.136
	151.45
	134.986
	141.06
	145.919
	124.382
	113.965
	149.178
	133.446
	149.465
	153.282
	145.232
	141.476
	149.067
	136.086
	154.666
	151.178
	139.364
	137.808
	145.067
	135.411
	151.368
	149.296
	157.054
	151.906
	142.396
	125.599
	145.029
	135.812
	160.149
	154.431
	134.328
	131.553
	137.679
	125.831
	132.299
	141.306
	144.691
	133.662
	137.655
	135.925
	147.738
	139.273
	156.56
	155.821
	147.015
	152.217
	148.749
	143.529
	150.883
	153.29
	139.657
	134.326
	146.176
	140.807
	146.237
	110.015
	132.401
	143.038
	127.341
	147.967
	128.13
	141.353
	151.646
	148.083
	148.852
	142.035
	149.28
	137.733
	150.4
	107.849
	143.029
	136.403
	140.162
	139.015
	150.056
	152.333
	153.66
	145.381
	139.651
	143.962
	150.527
	137.626
	144.804
	152.452
	137.218
	144.228
	124.592
	129.814
	152.025
	138.193
	130.851
	140.608
	131.015
	150.67
	120.323
	133.968
	141.188
	147.218
	141.521
	134.482
	92.1465
	118.726
	127.228
	143.881
	138.503
	141.563
	127.861
	130.818
	145.389
	152.974
	151.986
	152.672
	142.593
	142.021
	143.401
	129.779
	116.531
	143.761
	146.289
	139.817
	138.089
	136.919
	147.571
	157.462
	139.855
	124.412
	136.522
	147.294
	128.281
	132.353
	126.498
	141.195
	102.446
	144.634
	144.371
	144.365
	122.317
	140.014
	145.832
	150.641
	137.22
	134.302
	136.73
	136.258
	144.798
	141.311
	154.104
	136.416
	137.593
	117.515
	116.861
	98.7543
	97.4517
	123.518
	127.692
	141.049
	130.858
	128.056
	148.619
	135.672
	117.996
	118.588
	161.162
	124.54
	105.752
	149.577
	143.086
	133.522
	120.635
	139.881
	140.595
	129.232
	124.876
	112.68
	129.146
	132.878
	151.982
	164.55
	131.303
	137.675
	148.577
	102.922
	133.83
	113.26
	140.49
	149.106
	136.49
	138.957
	140.127
	116.125
	122.805
	101.214
	105.689
	131.935
	111.032
	128.156
	149.613
	145.946
	144.545
	144.379
	99.3087
	92.9034
	108.773
	115.295
	113.453
	110.686
	92.5828
	91.6108
	138.434
	133.482
	149.176
	126.529
	125.691
	123.223
	117.155
	95.6656
	109.412
	123.446
	97.4648
	145.098
	143.111
	103.301
	141.836
	116.811
	112.35
	126.24
	125.218
	107.056
	100.65
	108.676
	96.818
	135.01
	147.664
	102.488
	109.379
	140.821
	149.023
	141.17
	115.352
	139.501
	145.216
	111.525
	137.846
	122.611
	123.287
	104.842
	112.336
	102.939
	137.893
	98.4576
	111.645
	97.6865
	117.058
	143.361
	105.586
	98.1491
	101.78
	121.932
	115.618
	90.0999
	98.0575
	100.154
	104.103
	119.686
	124.6
	107.719
	113.611
	111.642
	96.6753
	118.933
	102.591
	103.455
	118.898
	113.869
	145.137
	114.853
	114.431
	113.859
	126.544
	87.0203
	140.595
	131.544
	136.132
	96.4628
	118.037
	139.677
	115.216
	103.585
	121.653
	134.835
	124.836
	136.361
	129.841
	157.411
	138.376
	138.838
	135.161
	139.668
	121.769
	99.3491
	109.436
	143.845
	142.381
	144.783
	149.534
	120.707
	148.375
	145.577
	150.453
	142.454
	151.716
	147.304
	142.058
	142.037
	131.584
	141.427
	144.442
	127.583
	143.48
	132.186
	100.872
	144.54
	132.365
	107.297
	129.915
	111.702
	149.841
	104.183
	103.977
	150.454
	136.695
	113.569
	138.975
	137.296
	134.077
	131.938
	126.864
	136.754
	144.742
	137.221
	150.049
	123.412
	128.551
	139.428
	143.542
	146.059
	139.965
	147.128
	137.033
	154.421
	149.975
	144.304
	135.457
	144.468
	140.84
	143.164
	155.059
	144.5
	120.216
	141.866
	136.784
	113.895
	136.636
	141.109
	124.027
	135.347
	144.497
	141.077
	121.775
	121.839
	130.109
	148.85
	128.646
	157.038
	150.464
	135.19
	130.804
	134.887
	152.994
	129.152
	146.479
	135.12
	123.652
	140.977
	142.59
	116.135
	125.113
	143.997
	137.267
	136.257
	124.129
	127.066
	131.846
	119.501
	118.47
	121.182
	110.225
	154.352
	129.269
	145.361
	115.782
	109.656
	145.761
	147.642
	145.584
	134.377
	106.424
	145.709
	143.491
	134.546
	114.06
	111.068
	136.762
	138.43
	131.914
	123.168
	100.114
	104.916
	105.694
	133.257
	156.352
	132.932
	106.8
	108.224
	109.536
	103.231
	94.3852
	106.322
	98.9734
	100.665
	114.74
	90.4015
	93.0815
	80.6326
	84.3288
	93.8765
	97.5978
	85.7742
	106.245
	98.7687
	84.3262
	91.7397
	108.82
	97.8955
	89.1029
	95.6055
	97.1147
	100.756
	111.206
	101.584
	99.7119
	92.8942
	100.253
	96.5751
	103.238
	142.8
	155.876
	155.347
	155.477
	150.708
	146.096
	139.667
	136.928
	155.342
	148.988
	150.347
	153.398
	145.757
	141.538
	152.29
	142.406
	136.312
	143.674
	148.244
	148.896
	144.625
	143.472
	152.881
	148.218
	144.523
	142.149
	142.706
	139.481
	146.43
	147.162
	136.183
	129.976
	139.094
	129.883
	144.797
	146.78
	137.541
	152.549
	130.267
	150.001
	102.286
	134.609
	154.442
	144.553
	160.427
	138.335
	131.863
	124.787
	118.164
	99.9419
	139.411
	127.884
	152.701
	123.196
	147.662
	148.355
	138.575
	146.703
	150.964
	152.745
	145.455
	153.104
	137.807
	150.36
	148.123
	145.689
	141.959
	131.189
	131.129
	135.038
	141.836
	148.677
	145.258
	152.043
	147.356
	155.081
	148.791
	145.52
	144.71
	147.647
	144.42
	137.769
	145.84
	154.919
	148.862
	145.909
	137.235
	140.441
	147.516
	141.336
	141.644
	148.652
	143.703
	143.494
	148.819
	148.008
	142.266
	152.586
	137.643
	137.603
	140.166
	141.228
	149.284
	139.304
	147.705
	149.373
	156.07
	158.774
	133.452
	145.284
	152.877
	132.819
	146.383
	146.08
	138.944
	146.271
	152.562
	139.252
	146.551
	156.633
	135.578
	152.984
	143.745
	148.479
	140.625
	155.957
	144.724
	158.181
	137.512
	131.003
	152.589
	147.416
	142.262
	129.553
	144.435
	140.95
	132.95
	128.247
	144.333
	148.324
	151.002
	140.764
	111.324
	108.113
	143.895
	151.503
	156.723
	154.534
	147.834
	143.231
	126.486
	138.164
	95.6034
	112.871
	71.9682
	90.6967
	90.7986
	90.8528
	89.8577
	75.6833
	96.0095
	99.2496
	106.022
	87.4611
	100.441
	92.0236
	99.0748
	95.0728
	94.4164
	120.533
	112.149
	93.0366
	100.825
	110.239
	93.9553
	91.0422
	84.4304
	100.771
	101.481
	97.0198
	92.7866
	97.0538
	109.57
	96.641
	97.2533
	111.627
	117.021
	98.714
	92.4658
	113.222
	92.2923
	86.8791
	95.9851
	91.5752
	91.3869
	93.1317
	96.0927
	92.4158
	89.4723
	123.35
	100.933
	99.5849
	105.79
	104.001
	121.041
	129.426
	133.532
	135.966
	96.0051
	99.4689
	113.124
	134.325
	101.114
	103.188
	95.4745
	92.4704
	131.433
	116.027
	76.6668
	95.3969
	77.9457
	110.847
	117.026
	76.891
	110.197
	94.3808
	95.8194
	104.605
	86.1485
	85.4828
	95.8861
	100.243
	88.3626
	103.308
	98.9508
	101.863
	108.678
	91.5847
	130.375
	122.919
	133.366
	153.709
	153.75
	94.9251
	94.0785
	104.013
	110.128
	99.9707
	107.702
	110.281
	96.5161
	112.629
	106.147
	108.292
	91.2723
	107.939
	96.4526
	104.701
	91.3679
	91.6128
	84.8561
	91.0718
	108.716
	107.479
	93.7457
	134.04
	103.4
	100.955
	121.258
	123.639
	99.2699
	98.0275
	134.895
	109.744
	96.3785
	103.061
	112.437
	101.023
	96.5038
	113.282
	115.882
	124.657
	99.4407
	112.252
	130.013
	105.826
	130.346
	124.394
	118.721
	109.958
	129.399
	129.382
	105.006
	111.473
	135.617
	136.944
	157.867
	148.541
	140.317
	149.102
	140.83
	137.943
	153.88
	147.004
	143.607
	140.112
	154.748
	144.507
	145.611
	151.165
	137.087
	136.201
	140.208
	129.445
	103.604
	138.143
	137.423
	102.057
	131.152
	113.533
	140.87
	122.827
	144.592
	114.746
	136.246
	142.122
	122.459
	123.141
	142.753
	120.661
	115.862
	134.831
	144.709
	129.242
	129.923
	104.166
	121.619
	97.7348
	120.573
	110.894
	148.227
	117.399
	100.945
	118.894
	110.347
	112.773
	124.268
	135.408
	121.247
	112.848
	109.746
	100.757
	97.7829
	121.327
	142.685
	129.46
	154.018
	162.456
	160.416
	142.585
	147.523
	146.857
	141.237
	162.851
	144.225
	154.582
	136.12
	142.674
	141.632
	145.964
	151.694
	142.791
	130.082
	101.808
	132.12
	102.532
	150.62
	135.248
	113.877
	136.502
	144.48
	155.542
	148.512
	159.392
	141.858
	134.608
	140.096
	135.179
	130.139
	141.902
	144.669
	136.383
	147.046
	150.128
	144.238
	149.19
	148.395
	135.473
	141.713
	139.197
	138.939
	123.575
	104.29
	99.4683
	124.727
	100.071
	98.3802
	102.578
	90.1798
	101.431
	101.916
	109.858
	100.318
	95.5265
	99.5681
	103.154
	103.147
	94.1644
	109.795
	90.0709
	127.378
	94.5596
	100.946
	109.83
	92.8398
	157.387
	118.118
	111.303
	109.948
	148.195
	109.571
	142.468
	165.139
	151.95
	139.099
	130.904
	155.868
	141.854
	156.769
	153.168
	129.113
	144.042
	152.35
	148.078
	137.543
	142.472
	147.493
	126.335
	148.762
	130.042
	135.791
	106.332
	103.073
	119.806
	117.704
	117.482
	115.081
	150.196
	142.402
	143.753
	137.308
	139.698
	140.871
	135.509
	145.139
	95.5422
	154.646
	144.452
	153.171
	145.693
	151.832
	116.978
	127.488
	123.716
	102.117
	133.931
	146.036
	131.174
	149.738
	132.868
	112.552
	106.843
	111.147
	149.28
	103.977
	117.922
	105.908
	131.291
	145.655
	142.765
	134.606
	150.584
	137.026
	145.319
	140.369
	128.663
	142.255
	109.652
	131.987
	136.671
	135.812
	88.4741
	103.922
	97.6195
	80.0992
	101.817
	128.995
	127.028
	94.4712
	113.496
	108.256
	125.261
	106.345
	109.482
	130.605
	106.809
	106.487
	102.344
	103.236
	108.392
	105.766
	115.511
	114.132
	97.2354
	101.012
	94.0784
	96.4811
	139.168
	101.869
	90.9166
	91.2357
	102.263
	91.8683
	102.492
	94.5277
	102.656
	104.035
	116.665
	127.152
	100.747
	125.301
	88.5359
	110.955
	92.3919
	98.8025
	101.891
	106.519
	94.479
	102.949
	104.411
	96.3246
	102.963
	109.919
	131.301
	104.269
	100.598
	108.882
	103.745
	118.347
	96.4975
	105.031
	87.7249
	93.6506
	103.301
	94.0162
	96.0543
	113.336
	106.97
	105.727
	95.5499
	92.0701
	151.296
	144.936
	142.233
	132.823
	147.775
	137.552
	128.462
	142.468
	133.315
	140.237
[truncated: 276,840+ more rows]

## Sheet: attackangles_nsp45
	nsp4/5
	Original data		Bin Centers	Counts	Proportion
	104.395		2.5	0	0
	118.716		7.5	0	0
	109.119		12.5	0	0
	114.552		17.5	0	0
	103.297		22.5	0	0
	117.127		27.5	0	0
	103.245		32.5	0	0
	109.711		37.5	0	0
	105.133		42.5	0	0
	111.562		47.5	0	0
	110.534		52.5	9	3.74791e-05
	100.578		57.5	78	0.000324819
	100.868		62.5	367	0.00152831
	103.005		67.5	1526	0.00635479
	95.7563		72.5	4624	0.0192559
	92.7019		77.5	11885	0.0494932
	97.34		82.5	22828	0.0950636
	97.8017		87.5	31299	0.13034
	98.9519		92.5	31221	0.130015
	97.2638		97.5	22752	0.0947471
	99.0378		102.5	14068	0.058584
	115.334		107.5	8806	0.0366712
	116.955		112.5	6631	0.0276137
	111.165		117.5	6007	0.0250152
	106.293		122.5	5570	0.0231954
	102.741		127.5	5628	0.0234369
	109.873		132.5	6794	0.0282925
	107.099		137.5	9219	0.0383911
	107.226		142.5	12739	0.0530495
	103.785		147.5	14953	0.0622694
	93.3662		152.5	12997	0.0541239
	113.4		157.5	7433	0.0309536
	107.894		162.5	2359	0.00982368
	94.9527		167.5	334	0.00139089
	108.441		172.5	7	2.91504e-05
	109.165		177.5	0	0
	108.8
	99.9401			SUM
	110.319			240134
	106.415
	106.261
	115.203
	105.292
	109.175
	103.657
	101.365
	108.338
	113.808
	102.865
	97.1819
	110.086
	103.965
	107.801
	123.669
	122.407
	110.44
	117.317
	109.255
	101.591
	109.858
	103.093
	105.064
	107.144
	108.071
	109.305
	109.873
	103.824
	116.566
	97.5584
	105.37
	107.195
	105.661
	98.104
	102.101
	96.585
	106.388
	96.1732
	94.531
	101.534
	95.4359
	105.476
	123.422
	105.385
	119.465
	104.832
	97.293
	100.375
	101.157
	99.4732
	110.007
	99.3333
	108.683
	106.283
	103.964
	112.25
	116.205
	119.178
	108.078
	106.053
	107.027
	109.665
	114.499
	121.881
	103.114
	112.631
	109.187
	103.323
	100.759
	103.698
	109.727
	97.007
	106.108
	101.135
	102.389
	110.904
	108.602
	105.443
	115.032
	106.805
	113.8
	99.6376
	97.845
	105.91
	114.86
	102.669
	110.059
	98.5159
	103.177
	106.596
	111.301
	105.907
	110.634
	107.269
	97.8608
	103.404
	108.284
	99.5252
	95.2827
	108.251
	102.219
	85.0656
	101.349
	112.968
	103.3
	103.027
	107.447
	105.701
	105.552
	93.7094
	110.896
	111.967
	102.769
	93.2242
	100.775
	88.2823
	93.3525
	99.2079
	91.514
	90.4952
	92.6111
	100.251
	103.127
	93.7586
	95.0246
	102.382
	102.132
	92.3624
	113.789
	105.608
	99.7434
	109.031
	104.595
	116.891
	112.199
	102.682
	94.4851
	98.0321
	106.942
	94.9048
	85.9429
	93.6611
	105.403
	99.1199
	91.339
	103.746
	102.26
	110.803
	92.3246
	94.699
	95.1686
	92.3006
	103.134
	104.467
	93.7306
	110.367
	88.0033
	103.209
	88.194
	90.1241
	96.7141
	112.502
	98.6903
	108.523
	93.6508
	110.865
	106.779
	92.6096
	97.4446
	99.9798
	110.103
	95.8044
	113.462
	88.7908
	108.543
	100.685
	97.7822
	93.4033
	98.1855
	106.882
	108.862
	108.861
	101.278
	103.64
	106.142
	97.293
	100.799
	115.473
	112.456
	90.9419
	101.556
	115.147
	98.8254
	116.638
	108.015
	95.7735
	107.299
	106.968
	115.101
	109.819
	97.3919
	107.309
	105.039
	96.7559
	97.4743
	97.3312
	102.442
	107.788
	108.33
	104.276
	98.6992
	94.9575
	104.674
	120.419
	119.03
	116.875
	109.56
	96.4785
	108.231
	104.778
	110.712
	114.029
	107.042
	114.098
	109.712
	101.37
	120.172
	100.533
	146.209
	128.978
	124.878
	140.287
	133.779
	115.655
	108.288
	136.177
	101.127
	118.293
	108.689
	110.51
	116.876
	131.333
	115.632
	110.13
	115.075
	154.099
	122.906
	136.075
	118.633
	127.059
	140.322
	129.053
	137.894
	137.88
	144.686
	137.632
	109.03
	111.703
	102.408
	110.336
	134.992
	129.879
	110.552
	124.436
	145.441
	128.11
	135.997
	129.891
	130.653
	133.885
	120.429
	118.729
	101.346
	105.02
	119.798
	127.856
	114.012
	114.049
	115.818
	116.095
	106.052
	101.219
	101.802
	118.793
	128.094
	140.579
	131.014
	134.604
	146.195
	122.72
	153.752
	156.546
	146.721
	137.09
	139.114
	132.582
	139.111
	142.313
	141.609
	141.13
	139.502
	139.663
	154.866
	147.188
	144.525
	132.657
	150.332
	133.508
	139.375
	143.483
	140.459
	148.888
	140.089
	131.011
	139.112
	123.356
	138.628
	143.771
	120.958
	135.606
	138.083
	118.432
	134.097
	132.656
	122.977
	137.14
	97.9435
	111.424
	106.965
	124.198
	107.722
	93.525
	92.5697
	97.9776
	101.25
	110.394
	103.726
	89.944
	106.269
	82.1525
	92.069
	111.681
	119.904
	129.913
	119.817
	122.15
	134.53
	134.426
	134.166
	121.251
	121.297
	101.185
	114.016
	100.805
	139.935
	123.042
	116.111
	137.642
	114.448
	132.891
	95.4772
	91.0514
	101.116
	136.932
	122.308
	116.601
	129.734
	137.636
	135.847
	149.398
	152.478
	144.947
	142.531
	150.61
	150.374
	133.286
	152.743
	139.526
	151.18
	142.163
	144.838
	156.551
	154.45
	148.212
	157.638
	131.569
	149.205
	142.07
	149.272
	154.212
	150.837
	156.038
	145.313
	135.216
	143.774
	152.412
	137.34
	147.358
	144.863
	147.17
	150.794
	138.112
	148.451
	145.077
	146.675
	133.583
	141.858
	155.488
	141.173
	145.901
	143.28
	148.284
	139.488
	137.834
	145.45
	150.036
	139.647
	128.734
	82.2126
	117.111
	127.8
	151.808
	151.306
	109.244
	93.5171
	104.968
	109.552
	102.131
	142.88
	149.758
	134.132
	139.62
	151.567
	143.678
	138.162
	149.691
	148.657
	133.055
	153.567
	157.03
	141.306
	155.473
	154.304
	136.885
	147.851
	149.855
	146.66
	151.153
	142.692
	156.605
	146.473
	151.203
	149.05
	155.625
	153.541
	155.297
	155.058
	144.926
	146.281
	150.545
	151.496
	148.671
	143.691
	154.902
	146.368
	143.18
	146.188
	159.043
	141.895
	150.577
	142.58
	143.385
	152.699
	137.823
	145.592
	144.993
	146.269
	140.768
	147.7
	145.975
	146.877
	144.332
	99.2256
	117.396
	116.067
	108.166
	154.094
	136.812
	153.711
	150.188
	145.846
	153.199
	150.003
	164.621
	142.348
	152.939
	140.06
	149.952
	122.482
	143.433
	127.758
	146.517
	144.87
	153.102
	144.935
	146.662
	146.519
	146.513
	150.603
	140.111
	157.448
	144.542
	143.089
	152.279
	157.332
	140.524
	145.353
	151.104
	149.233
	137.041
	140.192
	156.74
	145.355
	144.814
	141.254
	156.194
	142.889
	142.313
	140.009
	150.737
	151.576
	150.587
	149.516
	142.331
	131.495
	143.358
	130.525
	153.52
	149.612
	152.326
	155.895
	154.13
	152.593
	150.01
	155.936
	151.145
	162.056
	148.313
	143.321
	138.312
	148.952
	149.89
	136.006
	157.708
	148.738
	141.758
	142.502
	144.98
	135.523
	141.417
	156.662
	152.989
	141.156
	142.621
	143.061
	149.982
	139.553
	144.813
	147.953
	144.114
	147.629
	143.444
	158.537
	149.939
	147.489
	141.097
	153.279
	148.309
	148.396
	147.503
	138.039
	140.516
	124.148
	134.055
	147.168
	147.694
	146.448
	154.91
	154.897
	158.65
	151.526
	146.277
	154.734
	145.688
	144.525
	155.765
	138.104
	140.783
	152.922
	139.997
	138.879
	147.278
	145.533
	140.678
	146.34
	162.732
	155.782
	160.618
	155.321
	165.654
	147.331
	137.394
	156.197
	143.587
	144.645
	154.242
	133.614
	150.505
	145.604
	151.767
	146.98
	152.907
	142.841
	139.936
	148.598
	159.349
	148.84
	157.01
	151.753
	153.424
	148.978
	161.935
	147.916
	147.991
	144.201
	147.067
	136.692
	153.799
	155.887
	148.036
	154.988
	156.023
	146.546
	139.434
	150.163
	154.863
	148.329
	145.731
	144.643
	144.918
	155.464
	152.997
	149.931
	153.915
	136.487
	147.031
	144.233
	150.494
	153.634
	144.449
	153.006
	152.32
	150.815
	152.359
	148.909
	146.943
	156.105
	151.629
	161.709
	151.482
	154.258
	151.589
	139.953
	150.689
	158.19
	147.953
	153.056
	152.128
	143.921
	157.15
	141.553
	157.794
	125.921
	157.294
	162.803
	154.891
	145.519
	148.418
	148.107
	149.635
	159.741
	142.611
	149.795
	152.467
	147.153
	152.798
	159.236
	140.086
	146.235
	147.516
	141.954
	123.139
	159.978
	157.199
	148.196
	126.389
	128.538
	139.63
	149.441
	143.247
	154.932
	130.426
	130.772
	156.635
	145.985
	121.954
	145.753
	144.486
	137.065
	130.686
	142.353
	157.969
	143.018
	154.793
	146.986
	130.233
	149.115
	152.644
	155.042
	140.652
	155.708
	154.11
	149.406
	145.328
	153.937
	152.908
	157.218
	154.395
	145.412
	148.162
	145.468
	147.535
	131.36
	149.566
	137.185
	138.479
	156.775
	136.419
	142.463
	152.786
	142.014
	155.172
	107.68
	131.413
	126.816
	123.813
	148.536
	153.061
	149.274
	143.044
	152.663
	149.291
	146.135
	150.218
	149.17
	156.501
	152.972
	151.217
	158.956
	149.97
	140.945
	157.086
	136.565
	154.438
	155.621
	153.633
	151.588
	145.6
	146.137
	147.069
	133.379
	149.623
	145.813
	159.595
	146.125
	137.144
	159.985
	152.331
	144.221
	159.662
	146.972
	153.435
	153.448
	148.624
	148.048
	150.241
	152.724
	141.405
	149.721
	144.254
	131.406
	140.608
	149.483
	135.039
	145.144
	126.959
	135.326
	153.037
	143.226
	153.299
	158.124
	143.338
	146.621
	155.014
	139.946
	127.308
	135.899
	128.266
	152.957
	141.772
	146.361
	156.904
	158.001
	137.395
	153.375
	148.78
	153.838
	146.275
	146.608
	156.306
	132.038
	141.746
	145.372
	141.412
	143.181
	147.599
	151.28
	149.665
	150.116
	145.865
	150.112
	152.497
	141.041
	143.344
	155.542
	161.627
	150.873
	160.072
	151.165
	156.222
	141.996
	153.982
	151.985
	136.717
	157.796
	160.801
	154.204
	154.746
	150.309
	147.602
	150.565
	141.874
	143.861
	152.906
	145.016
	154.67
	147.769
	154.218
	137.367
	162.88
	156.968
	152.7
	148.095
	158.468
	155.847
	151.818
	162.693
	155.911
	162.52
	157.907
	151.69
	154.332
	161.727
	155.786
	153.731
	149.942
	152.102
	154.058
	147.072
	151.695
	138.768
	155.458
	140.737
	160.556
	143.469
	150.454
	146.787
	141.587
	145.355
	122.711
	126.543
	156.391
	161.418
	154.61
	149.131
	155.161
	138.486
	138.842
	148.404
	152.935
	146.945
	152.437
	148.39
	149.108
	151.896
	146.326
	132.125
	150.891
	149.614
	148.647
	151.647
	149.563
	141.773
	159.196
	152.18
	147.981
	148.596
	147.274
	142.439
	158.077
	153.52
	152.701
	138.266
	144.187
	135.81
	155.839
	148.487
	144.856
	129.11
	160.282
	149.457
	149.214
	141.919
	149.88
	160.161
	152.617
	147.6
	148.786
	150.765
	157.36
	148.967
	160.584
	148.388
	141.044
	158.823
	152.238
	146.011
	145.343
	160.715
	147.541
	152.478
	157.559
	158.398
	154.658
	161.95
	156.022
	148.369
	145.187
	144.919
	153.023
	150.03
	148.316
	142.428
	155.007
	133.168
	148.703
	148.11
	140.746
	145.006
	149.337
	153.457
	153.769
	153.603
	136.522
	139.279
	155.152
	146.179
	152.071
	143.234
	142.621
	108.409
	95.742
	97.258
	91.5835
	96.7653
	85.6853
	83.9445
	139.626
	146.183
	156.265
	151.304
	143.991
	145.164
	150.005
	146.804
	136.609
	152.074
	141.106
	151.679
	120.372
	149.815
	134.052
	147.381
	144.752
	143.802
	151.592
	153.418
	157.041
	154.486
	151.441
	159.19
	146.67
	160.116
	155.46
	156.894
	149.852
	147.865
	157.8
	153.046
	150.343
	156.87
	152.119
	150.961
	150.183
	156.291
	131.804
	144.936
	146.938
	142.321
	144.232
	141.912
	157.081
	156.259
	155.047
	158.13
	121.563
	143.564
	141.83
	148.641
	144.976
	149.637
	144.83
	157.801
	160.467
	155.705
	150.92
	155.024
	147.354
	149.155
	157.256
	151.93
	150.996
	148.414
	150.404
	158.567
	144.97
	145.554
	149.208
	158.084
	141.059
	152.714
	136.42
	146.402
	153.898
	119.983
	94.6897
	144.246
	138.485
	142.964
	146.29
	148.904
	150.899
	146.87
	150.644
	132.434
	140.388
	151.438
	153.369
	157.1
	153.433
	154.629
	141.267
	141.614
	144.836
	149.932
	114.91
	149.73
	153.652
	154.162
	158.28
	155.235
	151.715
	153.172
	158.879
	148.203
	157.953
	152.399
	155.758
	152.522
	148.952
	149.043
	157.738
	136.424
	156.503
	161.262
	153.266
	145.092
	161.717
	150.993
	149.708
	144.422
	148.794
	146.909
	153.866
	143.078
	137.223
	149.344
	148.466
	148.974
	162.039
	148.74
	153.083
	151.888
	140.871
	153.745
	155.233
	154.599
	151.649
	151.347
	156.152
	153.4
	151.418
	148.507
	157.947
	153.28
	157.281
	156.959
	142.986
	157.072
	144.183
	146.287
	154.419
	149.949
	145.171
	157.432
	150.438
	158.834
	152.022
	150.41
	152.577
	145.723
	152.563
	150.485
	131.894
	140.296
	96.283
	149.695
	113.367
	152.971
	148.158
	149.381
	157.667
	154.195
	152.357
	155.962
	156.634
	158.283
	154.62
	160.343
	146.974
	152.809
	154.817
	146.588
	156.996
	149.571
	153.239
	139.447
	135.152
	135.062
	154.346
	147.493
	149.787
	154.687
	135.134
	152.018
	146.297
	143.944
	155.037
	161.577
	147.378
	160.559
	153.967
	163.279
	154.549
	158.563
	145.119
	151.305
	127.287
	148.657
	141.617
	151.655
	157.127
	151.437
	156.027
	151.42
	147.416
	140.093
	154.574
	134.281
	152.348
	153.749
	136.788
	141.135
	160.094
	145.108
	147.432
	126.716
	123.778
	142.026
	158.339
	142.61
	121.505
	148.434
	151.69
	140.423
	146.488
	148.488
	141.348
	129.131
	109.254
	151.994
	136.809
	100.503
	146.994
	153.606
	147.958
	125.441
	150.617
	142.861
	143.062
	139.639
	138.597
	149.226
	152.818
	154.232
	144.345
	140.189
	149.467
	145.836
	150.117
	139.759
	137.451
	155.815
	145.719
	147.295
	151.415
	141.093
	144.196
	149.525
	127.13
	139.386
	131.669
	143.317
	147.36
	146.759
	147.416
	144.725
	146.938
	152.597
	156.228
	146.412
	153.445
	140.527
	150.754
	145.873
	149.239
	154.543
	148.489
	152.401
	153.634
	148.815
	147.631
	153.182
	148.464
	150.294
	133.587
	111.409
	135.176
	160.02
	145.853
	150.922
	150.445
	141.075
	148.754
	152.742
	147.945
	144.044
	145.85
	157.172
	157.603
	133.676
	157.834
	144.128
	144.58
	144.951
	139.896
	145.847
	153.041
	153.328
	149.285
	155.401
	151.968
	149.835
	153.357
	150.552
	155.716
	153.408
	151.372
	154.778
	153.13
	150.81
	143.336
	151.422
	152.667
	144.826
	162.125
	152.217
	153.438
	153.106
	145.803
	148.015
	143.258
	149.221
	156.131
	143.208
	147.626
	112.51
	150.248
	157.668
	137.4
	151.474
	152.246
	156.642
	145.605
	144.719
	156.558
	145.389
	152.567
	144.955
	157.649
	148.239
	138.957
	159.679
	150.327
	150.196
	148.867
	148.636
	160.901
	147.719
	148.637
	156.326
	143.838
	150.292
	153.782
	150.145
	147.781
	145.764
	153.681
	153.56
	145.63
	146.3
	141.625
	148.661
	150.145
	140.006
	159.869
	145.46
	149.792
	143.26
	162.606
	155.129
	89.1604
	99.9759
	113.868
	144.542
	106.498
	102.953
	89.189
	96.5481
	82.3866
	147.307
	135.072
	154.052
	157.077
	130.751
	147.671
	151.403
	155.194
	153.879
	157.433
	157.053
	145.365
	152.198
	158.401
	148.728
	156.185
	149.695
	148.018
	151.862
	148.639
	119.306
	150.891
	154.786
	140.92
	150.455
	150.205
	156.041
	156.04
	147.167
	148.422
	157.979
	159.327
	127.23
	153.315
	143.539
	149.416
	162.869
	146.329
	145.972
	151.334
	145.716
	151.659
	151.749
	150.056
	154.977
	152.352
	151.096
	138.794
	158.533
	144.502
	147.718
	154.363
	148.964
	144.234
	158.75
	150.478
	141.498
	153.565
	152.932
	154.5
	149.553
	153.323
	151.088
	139.586
	153.611
	149.665
	142.231
	145.908
	138.957
	149.856
	141.835
	151.855
	143.777
	147.996
	139.399
	148.954
	131.838
	145.506
	144.536
	134.451
	149.598
	135.464
	152.589
	141.219
	134.381
	148.385
	157.329
	154.639
	148.179
	144.368
	146.78
	157.446
	141.314
	152.914
	153.235
	157.645
	118.899
	158.046
	142.556
	143.572
	157.851
	153.672
	155.38
	142.981
	142.754
	123.405
	154.354
	151.367
	137.791
	151.718
	147.478
	152.766
	147.369
	147.283
	160.546
	139.197
	152.296
	118.801
	141.426
	139.143
	91.3156
	142.703
	149.877
	152.85
	152.917
	138.981
	150.054
	146.745
	155.95
	125.1
	142.136
	124.506
	147.995
	150.343
	157.737
	165.561
	159.356
	150.338
	150.797
	161.849
	155.366
	150.423
	155.37
	158.357
	154.081
	142.626
	148.983
	151.19
	164.245
	158.664
	158.622
	156.723
	141.038
	156.873
	155.183
	153.666
	159.577
	160.175
	146.306
	150.218
	153.479
	140.994
	151.863
	152.684
	157.536
	153.298
	127.79
	149.966
	157.376
	122.291
	141.873
	108.388
	91.8287
	102.347
	113.925
	103.777
	96.4383
	97.2397
	116.364
	157.253
	105.385
	105.127
	123.366
	107.57
	100.794
	132.824
	134.882
	144.799
	122.867
	141.18
	153.173
	144.857
	139.944
	159.842
	145.174
	163.055
	161.135
	143.562
	149.07
	155.113
	123.504
	111.704
	125.191
	142.628
	155.559
	101.36
	147.881
	147.83
	144.289
	109.413
	99.1688
	77.0185
	98.1234
	97.9815
	84.7007
	90.0562
	94.7913
	101.635
	88.6166
	128.482
	158.385
	158.829
	156.879
	148.447
	147.686
	129.452
	120.338
	163.052
	157.534
	147.942
	149.013
	152.898
	158.085
	109.976
	95.3152
	97.1198
	91.8853
	96.6659
	121.125
	101.886
	95.4351
	112.36
	109.999
	108.916
	102.055
	111.296
	136.528
	144.991
	145.228
	134.23
	123.901
	88.6006
	111.823
	100.531
	134.675
	132.378
	147.32
	135.992
	152.03
	153.621
	146.539
	154.48
	158.271
	160.467
	145.735
	154.503
	150.616
	117.912
	131.902
	128.574
	146.801
	140.534
	104.639
	140.151
	161.286
	147.231
	157.247
	145.868
	147.675
	133.127
	144.243
	148.398
	150.416
	130.995
	143.724
	149.568
	147.295
	149.919
	154.422
	147.758
	155.44
	152.462
	155.554
	157.923
	140.742
	153.097
	158.001
	147.407
	153.465
	153.604
	157.468
	143.257
	144.163
	116.569
	153.21
	150.952
	158.672
	151.923
	155.259
	149.207
	146.556
	149.737
	161.734
	146.953
	142.295
	152.949
	140.346
	151.992
	157.676
	147.188
	155.285
	143.771
	139.731
	145.885
	148.297
	157.15
	153.1
	128.066
	140.311
	150.817
	148.967
	154.391
	146.73
	141.012
	155.228
	147.222
	157.368
	155.838
	160.387
	153.941
	154.041
	160.2
	148.395
	152.404
	156.11
	157.614
	156.637
	151.985
	156.41
	147.281
	150.81
	153.284
	153.619
	153.784
	157.383
	153.026
	150.948
	154.967
	148.566
	148.478
	162.425
	154.992
	152.417
	144.973
	141.661
	144.796
	156.608
	159.998
	149.703
	147.139
	143.78
	136.648
	149.799
	152.266
	152.555
	149.183
	149.963
	149.717
	153.59
	138.829
	155.122
	152.536
	147.782
	150.844
	128.619
	148.755
	157.817
	140.675
	150.161
	136.376
	150.224
	149.376
	159.908
	145.12
	155.556
	152.111
	157.013
	134.623
	150.987
	161.881
	149.748
	141.38
	141.547
	151.382
	149.978
	149.528
	149.663
	145.923
	156.417
	156.219
	148.87
	152.424
	156.691
	154.415
	134.994
	125.909
	153.665
	154.2
	151.198
	159.325
	146.711
	146.438
	154.001
	152.687
	144.218
	160.518
	157.915
	157.92
	150.119
	142.031
	150.751
	150.027
	155.926
	135.473
	124.021
	135.214
	160.033
	152.327
	149.603
	150.688
	150.74
	152.057
	151.074
	150.385
	145.346
	155.196
	160.347
	135.506
	144.527
	121.855
	151.931
	154.671
	146.474
	150.262
	140.259
	147.8
	135.02
	142.815
	147.491
	145.655
	162.448
	152.814
	154.286
	147.582
	159.691
	140.695
	152.713
	156.791
	155.452
	140.662
	152.146
	162.734
	162.444
	165.588
	161.4
	143.382
	155.804
	160.471
	153.339
	157.432
	152.281
	156.544
	153.832
	152.896
	163.582
	152.707
	154.842
	143.731
	152.159
	161.555
	155.363
	153.702
	130.239
	128.957
	137.134
	88.3088
	95.0153
	89.933
	82.1126
	93.6737
	144.529
	148.452
	143.337
	153.4
	151.582
	153.051
	152.919
	142.147
	145.591
	145.945
	154.143
	158.616
	152.041
	148.89
	146.198
	138.941
	149.438
	135.166
	140.983
	153.304
	152.419
	148.995
	145.705
	146.042
	161.576
	151.36
	159.273
	148.105
	157.623
	158.165
	156.446
	157.786
	146.377
	151.335
	142.121
	154.12
	152.279
	157.658
	148.928
	149.595
	150.805
	147.056
	155.609
	156.899
	144.285
	142.547
	147.597
	155.923
	144.484
	151.735
	151.482
	147.474
	152.663
	149.363
	147.76
	152.557
	149.51
	146.601
	151.279
[truncated: 238,136+ more rows]
